# Supplementary material
Source: MDPI journal article supplement (https://www.mdpi.com/2073-4433/13/1/19)
Supplement: s1 [file s1]

# Supplementary materials

Table S1

Geographical locations of gauging stations used in the present study.

| NO. | Station-ID | Lat(°N) | Lon(°E) | NO. | Station-ID | Lat(°N) | Lon(°E) | NO. | Station-ID | Lat(°N) | Lon(°E) |
|-----|------------|---------|---------|-----|------------|---------|---------|-----|------------|---------|---------|
| 1   | 50136      | 53.29   | 122.21  | 265 | 54284      | 42.06   | 127.34  | 529 | 57625      | 28.43   | 107.21  |
| 2   | 50353      | 51.43   | 126.39  | 266 | 54285      | 42.33   | 128.17  | 530 | 57633      | 28.37   | 108.44  |
| 3   | 50425      | 50.28   | 120.06  | 267 | 54286      | 42.32   | 128.58  | 531 | 57642      | 28.43   | 109.38  |
| 4   | 50434      | 50.3    | 121.28  | 268 | 54292      | 42.54   | 129.31  | 532 | 57647      | 28.02   | 109.06  |
| 5   | 50468      | 50.15   | 127.27  | 269 | 54308      | 41.12   | 116.32  | 533 | 57649      | 28.19   | 109.44  |
| 6   | 50514      | 49.37   | 117.26  | 270 | 54311      | 41.57   | 117.33  | 534 | 57655      | 28.27   | 110.23  |
| 7   | 50527      | 49.13   | 119.45  | 271 | 54324      | 41.35   | 120.25  | 535 | 57662      | 28.55   | 111.33  |
| 8   | 50548      | 49.05   | 123.53  | 272 | 54326      | 41.23   | 119.42  | 536 | 57669      | 28.28   | 111.18  |
| 9   | 50557      | 49.1    | 125.13  | 273 | 54333      | 41.59   | 122.48  | 537 | 57671      | 28.51   | 112.22  |
| 10  | 50564      | 49.26   | 127.21  | 274 | 54334      | 41.32   | 121.14  | 538 | 57673      | 28.49   | 113.05  |
| 11  | 50603      | 48.42   | 116.58  | 275 | 54335      | 41.41   | 122.01  | 539 | 57679      | 28.15   | 112.5   |
| 12  | 50618      | 48.13   | 118.16  | 276 | 54337      | 41.07   | 121.07  | 540 | 57682      | 28.43   | 113.35  |
| 13  | 50632      | 48.46   | 121.55  | 277 | 54339      | 41.07   | 122.59  | 541 | 57696      | 28.25   | 114.47  |
| 14  | 50639      | 48      | 122.44  | 278 | 54342      | 41.47   | 123.24  | 542 | 57707      | 27.2    | 105.2   |
| 15  | 50656      | 48.17   | 126.31  | 279 | 54346      | 41.19   | 123.47  | 543 | 57710      | 27.51   | 106.22  |
| 16  | 50658      | 48.04   | 125.52  | 280 | 54349      | 41.15   | 124.29  | 544 | 57718      | 27.02   | 106.43  |
| 17  | 50727      | 47.13   | 119.58  | 281 | 54351      | 41.5    | 124.07  | 545 | 57722      | 27.47   | 107.29  |
| 18  | 50739      | 47.21   | 123.1   | 282 | 54353      | 41.42   | 124.49  | 546 | 57729      | 27.05   | 107.44  |
| 19  | 50742      | 47.51   | 124.41  | 283 | 54363      | 41.41   | 125.55  | 547 | 57731      | 28.2    | 108.3   |
| 20  | 50745      | 47.2    | 123.56  | 284 | 54365      | 41.15   | 125.21  | 548 | 57741      | 27.35   | 109.04  |
| 21  | 50756      | 47.26   | 126.58  | 285 | 54374      | 41.43   | 126.57  | 549 | 57745      | 27.27   | 109.38  |
| 22  | 50758      | 47.11   | 125.53  | 286 | 54377      | 41.06   | 126.1   | 550 | 57752      | 27.53   | 110.33  |
| 23  | 50774      | 47.3    | 129.2   | 287 | 54386      | 41.21   | 128.18  | 551 | 57758      | 27.04   | 110.22  |
| 24  | 50788      | 47.14   | 131.59  | 288 | 54401      | 40.5    | 115.11  | 552 | 57761      | 27.53   | 110.1   |
| 25  | 50834      | 46.36   | 121.14  | 289 | 54405      | 40.25   | 115.3   | 553 | 57766      | 27.15   | 111.23  |
| 26  | 50838      | 46.13   | 122.03  | 290 | 54406      | 40.27   | 115.57  | 554 | 57774      | 27.28   | 112.11  |
| 27  | 50844      | 46.24   | 123.25  | 291 | 54416      | 40.23   | 116.5   | 555 | 57776      | 27.15   | 112.45  |
| 28  | 50853      | 46.42   | 126.59  | 292 | 54423      | 40.58   | 117.5   | 556 | 57779      | 27      | 113.2   |
| 29  | 50854      | 46.24   | 125.21  | 293 | 54429      | 40.12   | 117.57  | 557 | 57780      | 27.5    | 113.09  |
| 30  | 50862      | 46.59   | 128.03  | 294 | 54436      | 40.24   | 118.53  | 558 | 57789      | 27.08   | 113.56  |
| 31  | 50873      | 46.25   | 130.2   | 295 | 54449      | 40      | 119.44  | 559 | 57793      | 27.51   | 114.21  |
| 32  | 50877      | 46.18   | 129.35  | 296 | 54452      | 40.48   | 119.49  | 560 | 57799      | 27.05   | 114.55  |
| 33  | 50888      | 46.19   | 132.11  | 297 | 54454      | 40.21   | 120.21  | 561 | 57803      | 27.03   | 106     |
| 34  | 50915      | 45.3    | 118     | 298 | 54455      | 40.36   | 120.34  | 562 | 57805      | 26.39   | 105.42  |
| 35  | 50936      | 45.38   | 122.51  | 299 | 54470      | 40.59   | 122.04  | 563 | 57806      | 26.14   | 105.55  |
| 36  | 50945      | 45.3    | 124.16  | 300 | 54471      | 40.4    | 122.14  | 564 | 57816      | 26.35   | 106.43  |
| 37  | 50948      | 45      | 124.01  | 301 | 54472      | 40.53   | 122.43  | 565 | 57825      | 26.36   | 107.59  |

|    |       |       |        |     |       |       |        |     |       |       |        |
|----|-------|-------|--------|-----|-------|-------|--------|-----|-------|-------|--------|
| 38 | 50949 | 45.01 | 124.58 | 302 | 54476 | 40.13 | 122.11 | 566 | 57827 | 26.17 | 107.31 |
| 39 | 50950 | 45.42 | 125.15 | 303 | 54486 | 40.16 | 123.17 | 567 | 57832 | 26.58 | 108.41 |
| 40 | 50953 | 45.45 | 126.38 | 304 | 54493 | 40.44 | 124.47 | 568 | 57839 | 26.1  | 109    |
| 41 | 50955 | 45.22 | 126.14 | 305 | 54497 | 40.11 | 124.19 | 569 | 57840 | 26.53 | 109.12 |
| 42 | 50963 | 45.58 | 128.44 | 306 | 54511 | 39.56 | 116.2  | 570 | 57841 | 26.4  | 109.29 |
| 43 | 50968 | 45.13 | 127.58 | 307 | 54518 | 39.06 | 116.26 | 571 | 57845 | 26.22 | 109.3  |
| 44 | 50973 | 45.45 | 130.33 | 308 | 54525 | 39.42 | 117.18 | 572 | 57853 | 26.44 | 110.37 |
| 45 | 50978 | 45.17 | 130.57 | 309 | 54527 | 39.08 | 117.11 | 573 | 57857 | 26.17 | 110.12 |
| 46 | 50983 | 45.46 | 132.56 | 310 | 54534 | 39.39 | 118.11 | 574 | 57866 | 26.22 | 111.31 |
| 47 | 51053 | 47.53 | 86.12  | 311 | 54539 | 39.2  | 118.54 | 575 | 57872 | 26.56 | 112.35 |
| 48 | 51059 | 47.26 | 85.52  | 312 | 54563 | 39.44 | 121.45 | 576 | 57874 | 26.26 | 112.17 |
| 49 | 51060 | 47.42 | 86.51  | 313 | 54579 | 39.14 | 122.4  | 577 | 57889 | 26    | 113.56 |
| 50 | 51068 | 47.06 | 87.21  | 314 | 54584 | 39.4  | 123.02 | 578 | 57894 | 26.38 | 114.06 |
| 51 | 51076 | 47.44 | 88.05  | 315 | 54602 | 38.53 | 115.34 | 579 | 57896 | 26.15 | 114.2  |
| 52 | 51087 | 47.12 | 89.47  | 316 | 54606 | 38.15 | 115.45 | 580 | 57902 | 25.25 | 105.15 |
| 53 | 51133 | 46.42 | 82.58  | 317 | 54618 | 38.04 | 116.33 | 581 | 57906 | 25.15 | 105.59 |
| 54 | 51156 | 46.38 | 86.11  | 318 | 54623 | 38.58 | 117.49 | 582 | 57907 | 25.05 | 105.01 |
| 55 | 51186 | 46.36 | 90.39  | 319 | 54624 | 38.36 | 117.31 | 583 | 57910 | 25.43 | 106.09 |
| 56 | 51232 | 45.48 | 82.18  | 320 | 54660 | 38.48 | 121.13 | 584 | 57912 | 26.11 | 106.41 |
| 57 | 51238 | 45    | 81.57  | 321 | 54662 | 38.54 | 121.38 | 585 | 57916 | 25.27 | 106.46 |
| 58 | 51241 | 45.52 | 83.37  | 322 | 54705 | 37.22 | 115.23 | 586 | 57922 | 25.51 | 107.32 |
| 59 | 51243 | 45.47 | 84.52  | 323 | 54715 | 37.2  | 116.34 | 587 | 57926 | 25.25 | 107.53 |
| 60 | 51288 | 45.14 | 90.33  | 324 | 54725 | 37.3  | 117.32 | 588 | 57932 | 25.52 | 108.35 |
| 61 | 51330 | 44.57 | 81.13  | 325 | 54727 | 36.59 | 117.19 | 589 | 57947 | 25.13 | 109.24 |
| 62 | 51334 | 44.37 | 82.58  | 326 | 54751 | 37.55 | 120.46 | 590 | 57957 | 25.15 | 110.1  |
| 63 | 51346 | 44.16 | 84.52  | 327 | 54753 | 37.37 | 120.19 | 591 | 57965 | 25.33 | 111.42 |
| 64 | 51358 | 44.2  | 85.1   | 328 | 54774 | 37.31 | 122.08 | 592 | 57972 | 25.45 | 112.59 |
| 65 | 51365 | 44.37 | 87.42  | 329 | 54776 | 37.23 | 122.42 | 593 | 57974 | 25.32 | 112.18 |
| 66 | 51367 | 44.07 | 86.49  | 330 | 54808 | 36.02 | 115.35 | 594 | 57993 | 25.5  | 114.5  |
| 67 | 51379 | 44.03 | 89.27  | 331 | 54823 | 36.42 | 117.04 | 595 | 57996 | 25.08 | 114.19 |
| 68 | 51431 | 43.55 | 81.17  | 332 | 54826 | 36.09 | 117.18 | 596 | 58005 | 34.27 | 115.49 |
| 69 | 51433 | 43.48 | 82.34  | 333 | 54836 | 36.11 | 118.09 | 597 | 58015 | 34.25 | 116.21 |
| 70 | 51437 | 43.08 | 81     | 334 | 54842 | 36.46 | 119.57 | 598 | 58026 | 34.27 | 117.58 |
| 71 | 51463 | 43.47 | 87.37  | 335 | 54843 | 36.42 | 119.08 | 599 | 58027 | 34.17 | 117.18 |
| 72 | 51467 | 43.01 | 86.36  | 336 | 54857 | 36.03 | 120.25 | 600 | 58034 | 34.32 | 118.14 |
| 73 | 51470 | 43.53 | 88.07  | 337 | 54863 | 36.46 | 121.12 | 601 | 58038 | 34.14 | 118.57 |
| 74 | 51477 | 43.12 | 88.3   | 338 | 54916 | 35.35 | 116.55 | 602 | 58040 | 34.5  | 119.08 |
| 75 | 51495 | 43.29 | 91.39  | 339 | 54929 | 35.16 | 117.56 | 603 | 58047 | 34.29 | 119.19 |
| 76 | 51526 | 42.21 | 88.28  | 340 | 54936 | 35.36 | 118.52 | 604 | 58102 | 33.53 | 115.47 |
| 77 | 51542 | 42.48 | 84.27  | 341 | 54945 | 35.23 | 119.32 | 605 | 58111 | 33.54 | 116.25 |
| 78 | 51567 | 42.03 | 86.34  | 342 | 55228 | 32.11 | 79.59  | 606 | 58118 | 33.17 | 116.32 |
| 79 | 51573 | 42.55 | 91     | 343 | 55279 | 31.48 | 89.4   | 607 | 58122 | 33.39 | 117.03 |

|     |       |       |        |     |       |       |        |     |       |       |        |
|-----|-------|-------|--------|-----|-------|-------|--------|-----|-------|-------|--------|
| 80  | 51581 | 42.53 | 90.17  | 344 | 55299 | 32.06 | 92.16  | 608 | 58130 | 33.53 | 118.04 |
| 81  | 51628 | 41.1  | 80.14  | 345 | 55472 | 30.57 | 88.38  | 609 | 58135 | 33.25 | 118.23 |
| 82  | 51633 | 41.48 | 81.53  | 346 | 55493 | 30.29 | 91.05  | 610 | 58138 | 33.03 | 118.37 |
| 83  | 51639 | 41.14 | 82.47  | 347 | 55578 | 29.13 | 88.55  | 611 | 58143 | 33.48 | 119.48 |
| 84  | 51642 | 41.45 | 84.15  | 348 | 55591 | 29.43 | 91.02  | 612 | 58150 | 34.05 | 120.15 |
| 85  | 51644 | 41.45 | 83.04  | 349 | 55598 | 29.15 | 91.47  | 613 | 58158 | 33.02 | 120.47 |
| 86  | 51655 | 41.26 | 86.03  | 350 | 55664 | 28.35 | 86.37  | 614 | 58203 | 32.56 | 115.5  |
| 87  | 51656 | 41.45 | 86.09  | 351 | 55680 | 28.55 | 89.36  | 615 | 58208 | 32.12 | 115.42 |
| 88  | 51701 | 40.31 | 75.24  | 352 | 55696 | 28.25 | 92.28  | 616 | 58215 | 32.32 | 116.35 |
| 89  | 51704 | 39.43 | 76.09  | 353 | 55773 | 27.44 | 89.05  | 617 | 58221 | 32.56 | 117.22 |
| 90  | 51705 | 39.42 | 75.11  | 354 | 56004 | 33.57 | 92.37  | 618 | 58225 | 32.32 | 117.4  |
| 91  | 51709 | 39.28 | 75.52  | 355 | 56018 | 33.09 | 94.43  | 619 | 58236 | 32.19 | 118.2  |
| 92  | 51711 | 40.47 | 77.55  | 356 | 56021 | 34.36 | 95.51  | 620 | 58238 | 32.05 | 118.45 |
| 93  | 51716 | 39.46 | 78.1   | 357 | 56029 | 32.52 | 96.4   | 621 | 58241 | 32.45 | 119.3  |
| 94  | 51720 | 40.3  | 79.03  | 358 | 56033 | 34.24 | 98.31  | 622 | 58251 | 32.51 | 120.19 |
| 95  | 51730 | 40.33 | 81.19  | 359 | 56034 | 33.55 | 97.31  | 623 | 58255 | 32.24 | 120.29 |
| 96  | 51765 | 40.39 | 87.42  | 360 | 56038 | 33.14 | 97.44  | 624 | 58259 | 32.01 | 120.54 |
| 97  | 51777 | 39.05 | 88.03  | 361 | 56043 | 34.45 | 99.5   | 625 | 58265 | 32.03 | 121.36 |
| 98  | 51804 | 37.47 | 75.15  | 362 | 56046 | 33.48 | 99.48  | 626 | 58311 | 31.46 | 116.29 |
| 99  | 51810 | 38.56 | 77.4   | 363 | 56065 | 34.17 | 101.35 | 627 | 58314 | 31.19 | 116.22 |
| 100 | 51811 | 38.26 | 77.16  | 364 | 56067 | 33.19 | 101.14 | 628 | 58319 | 31.03 | 116.56 |
| 101 | 51818 | 37.39 | 78.16  | 365 | 56079 | 33.2  | 102.43 | 629 | 58321 | 31.53 | 117.15 |
| 102 | 51828 | 37.13 | 79.54  | 366 | 56080 | 34.55 | 103.04 | 630 | 58326 | 31.34 | 117.3  |
| 103 | 51839 | 37    | 82.46  | 367 | 56093 | 34.3  | 104.05 | 631 | 58336 | 31.32 | 118.35 |
| 104 | 51855 | 38.08 | 85.32  | 368 | 56096 | 33.23 | 104.41 | 632 | 58343 | 31.45 | 119.55 |
| 105 | 51886 | 38.13 | 90.31  | 369 | 56106 | 31.51 | 93.4   | 633 | 58345 | 31.26 | 119.31 |
| 106 | 51931 | 36.5  | 81.39  | 370 | 56116 | 31.29 | 95.29  | 634 | 58354 | 31.27 | 120.26 |
| 107 | 52101 | 43.36 | 93     | 371 | 56125 | 32.18 | 96.17  | 635 | 58356 | 31.25 | 120.57 |
| 108 | 52112 | 43.47 | 94.59  | 372 | 56137 | 31.11 | 96.59  | 636 | 58358 | 31.04 | 120.26 |
| 109 | 52118 | 43.16 | 94.42  | 373 | 56144 | 31.5  | 98.38  | 637 | 58362 | 31.25 | 121.28 |
| 110 | 52203 | 42.5  | 93.3   | 374 | 56146 | 31.38 | 99.59  | 638 | 58402 | 30.44 | 115.37 |
| 111 | 52267 | 41.14 | 101.34 | 375 | 56151 | 33.03 | 100.25 | 639 | 58407 | 30.15 | 115.01 |
| 112 | 52313 | 41.47 | 95.07  | 376 | 56152 | 32.25 | 100.44 | 640 | 58414 | 30.32 | 116.2  |
| 113 | 52323 | 41.35 | 96.53  | 377 | 56167 | 31    | 101.1  | 641 | 58419 | 29.35 | 116.48 |
| 114 | 52418 | 40.08 | 94.47  | 378 | 56172 | 31.55 | 102.36 | 642 | 58424 | 30.37 | 117.02 |
| 115 | 52424 | 40.3  | 95.55  | 379 | 56173 | 32.48 | 102.33 | 643 | 58429 | 30.57 | 117.48 |
| 116 | 52436 | 40.16 | 97.11  | 380 | 56178 | 31    | 102.22 | 644 | 58436 | 30.37 | 118.59 |
| 117 | 52446 | 40.18 | 99.31  | 381 | 56182 | 32.39 | 103.34 | 645 | 58437 | 30.08 | 118.09 |
| 118 | 52447 | 40    | 98.54  | 382 | 56187 | 30.42 | 103.5  | 646 | 58450 | 30.53 | 120.07 |
| 119 | 52495 | 40.28 | 104.35 | 383 | 56188 | 31    | 103.35 | 647 | 58457 | 30.2  | 120.14 |
| 120 | 52533 | 39.4  | 98.43  | 384 | 56196 | 31.29 | 104.46 | 648 | 58464 | 30.38 | 121.06 |
| 121 | 52546 | 39.23 | 99.43  | 385 | 56202 | 30.48 | 93.17  | 649 | 58467 | 30.16 | 121.1  |

|     |       |       |        |     |       |       |        |     |       |       |        |
|-----|-------|-------|--------|-----|-------|-------|--------|-----|-------|-------|--------|
| 122 | 52576 | 39.13 | 101.4  | 386 | 56227 | 30.06 | 95.47  | 650 | 58472 | 30.44 | 122.27 |
| 123 | 52602 | 38.45 | 93.35  | 387 | 56247 | 30.01 | 98.56  | 651 | 58477 | 30.04 | 122.07 |
| 124 | 52633 | 38.52 | 98.22  | 388 | 56251 | 30.57 | 100.16 | 652 | 58500 | 29.5  | 115.1  |
| 125 | 52645 | 38.37 | 99.21  | 389 | 56257 | 30    | 100.16 | 653 | 58506 | 29.35 | 115.59 |
| 126 | 52652 | 38.55 | 100.35 | 390 | 56287 | 30    | 103.03 | 654 | 58507 | 29.16 | 115.05 |
| 127 | 52657 | 38.11 | 100.18 | 391 | 56312 | 29.41 | 94.35  | 655 | 58519 | 29.01 | 116.4  |
| 128 | 52661 | 38.47 | 101.05 | 392 | 56357 | 29.03 | 100.11 | 656 | 58520 | 29.55 | 117.5  |
| 129 | 52674 | 38.14 | 101.58 | 393 | 56374 | 30.03 | 102.02 | 657 | 58527 | 29.1  | 117.15 |
| 130 | 52679 | 38.05 | 102.55 | 394 | 56385 | 29.28 | 103.41 | 658 | 58531 | 29.45 | 118.23 |
| 131 | 52681 | 38.38 | 103.05 | 395 | 56386 | 29.3  | 103.45 | 659 | 58543 | 29.37 | 119.01 |
| 132 | 52707 | 36.54 | 93.1   | 396 | 56444 | 28.49 | 98.49  | 660 | 58549 | 29.1  | 119.45 |
| 133 | 52713 | 37.5  | 95.17  | 397 | 56459 | 28.11 | 100.48 | 661 | 58556 | 29.36 | 120.49 |
| 134 | 52737 | 37.15 | 97.08  | 398 | 56462 | 28.59 | 101.33 | 662 | 58557 | 29.19 | 120.04 |
| 135 | 52754 | 37.2  | 100.1  | 399 | 56475 | 28.37 | 102.33 | 663 | 58562 | 29.52 | 121.3  |
| 136 | 52765 | 37.27 | 101.37 | 400 | 56479 | 28.14 | 102.57 | 664 | 58569 | 29.12 | 121.57 |
| 137 | 52787 | 37.12 | 102.52 | 401 | 56485 | 28.18 | 103.36 | 665 | 58600 | 28.51 | 115.22 |
| 138 | 52797 | 37.14 | 104.11 | 402 | 56492 | 28.49 | 104.32 | 666 | 58606 | 28.4  | 115.58 |
| 139 | 52818 | 36.12 | 94.38  | 403 | 56533 | 27.56 | 98.35  | 667 | 58608 | 28.01 | 115.22 |
| 140 | 52825 | 36.22 | 96.27  | 404 | 56543 | 27.32 | 99.57  | 668 | 58622 | 28.51 | 117.34 |
| 141 | 52836 | 36.15 | 98.05  | 405 | 56548 | 27.13 | 99.31  | 669 | 58626 | 28.17 | 117.06 |
| 142 | 52856 | 36.04 | 100.54 | 406 | 56565 | 27.27 | 101.37 | 670 | 58633 | 28.58 | 118.53 |
| 143 | 52866 | 36.35 | 101.55 | 407 | 56571 | 27.53 | 102.18 | 671 | 58634 | 28.4  | 118.15 |
| 144 | 52868 | 36.22 | 101.22 | 408 | 56586 | 27.2  | 103.45 | 672 | 58637 | 28.26 | 117.54 |
| 145 | 52876 | 36.14 | 102.56 | 409 | 56651 | 26.53 | 100.1  | 673 | 58646 | 28.28 | 119.55 |
| 146 | 52884 | 36.33 | 103.4  | 410 | 56664 | 26.38 | 101.16 | 674 | 58652 | 28.52 | 120.44 |
| 147 | 52895 | 36.36 | 104.39 | 411 | 56671 | 26.5  | 102.15 | 675 | 58665 | 28.4  | 121.3  |
| 148 | 52908 | 35.17 | 93.36  | 412 | 56684 | 26.26 | 103.11 | 676 | 58666 | 28.27 | 121.53 |
| 149 | 52943 | 35.48 | 99.4   | 413 | 56691 | 26.51 | 104.15 | 677 | 58667 | 28.05 | 121.17 |
| 150 | 52955 | 35.3  | 100.35 | 414 | 56693 | 26.44 | 104.47 | 678 | 58705 | 27.21 | 115.25 |
| 151 | 52974 | 35.3  | 102.05 | 415 | 56739 | 25    | 98.3   | 679 | 58715 | 27.33 | 116.36 |
| 152 | 52983 | 35.52 | 104    | 416 | 56748 | 25.05 | 99.1   | 680 | 58718 | 27.12 | 116.23 |
| 153 | 52984 | 35.37 | 103.11 | 417 | 56751 | 25.43 | 100.11 | 681 | 58725 | 27.2  | 117.28 |
| 154 | 52986 | 35.22 | 103.52 | 418 | 56763 | 25.41 | 102.17 | 682 | 58730 | 27.43 | 118    |
| 155 | 52996 | 35.25 | 104.5  | 419 | 56768 | 25.01 | 101.32 | 683 | 58731 | 28    | 118.35 |
| 156 | 53068 | 44.13 | 111.32 | 420 | 56778 | 25.02 | 102.43 | 684 | 58734 | 27.2  | 118.06 |
| 157 | 53083 | 44.4  | 113.44 | 421 | 56786 | 25.35 | 103.5  | 685 | 58737 | 27.05 | 118.19 |
| 158 | 53149 | 42.29 | 110.08 | 422 | 56792 | 25.47 | 104.57 | 686 | 58742 | 27.58 | 119.37 |
| 159 | 53192 | 43.41 | 114.29 | 423 | 56793 | 25.47 | 104.39 | 687 | 58744 | 27.32 | 119.25 |
| 160 | 53195 | 43.15 | 114.3  | 424 | 56838 | 23.47 | 98.06  | 688 | 58752 | 27.48 | 120.37 |
| 161 | 53276 | 42.24 | 112.43 | 425 | 56856 | 24.28 | 101.05 | 689 | 58754 | 27.2  | 120.13 |
| 162 | 53336 | 41.28 | 108.57 | 426 | 56875 | 24.2  | 102.34 | 690 | 58806 | 26.22 | 115.5  |
| 163 | 53352 | 41.48 | 110.3  | 427 | 56886 | 24.32 | 103.44 | 691 | 58813 | 26.45 | 116.06 |

|     |       |       |        |     |       |       |        |     |       |       |        |
|-----|-------|-------|--------|-----|-------|-------|--------|-----|-------|-------|--------|
| 164 | 53362 | 41.32 | 111.42 | 428 | 56946 | 23.3  | 99.43  | 692 | 58818 | 26.14 | 116.38 |
| 165 | 53391 | 41.46 | 114.06 | 429 | 56951 | 23.51 | 100.13 | 693 | 58820 | 26.53 | 117.08 |
| 166 | 53399 | 41.08 | 114.52 | 430 | 56954 | 22.48 | 100.07 | 694 | 58834 | 26.39 | 118.1  |
| 167 | 53446 | 40.5  | 109.5  | 431 | 56959 | 21.55 | 100.45 | 695 | 58837 | 26.1  | 118.09 |
| 168 | 53463 | 40.49 | 111.41 | 432 | 56964 | 22.33 | 101.02 | 696 | 58843 | 26.53 | 120    |
| 169 | 53478 | 39.59 | 112.27 | 433 | 56966 | 23.38 | 101.58 | 697 | 58846 | 26.4  | 119.31 |
| 170 | 53480 | 40.58 | 113.03 | 434 | 56969 | 21.25 | 101.52 | 698 | 58847 | 26.05 | 119.18 |
| 171 | 53487 | 40.06 | 113.2  | 435 | 56977 | 22.31 | 102.08 | 699 | 58911 | 25.45 | 116.2  |
| 172 | 53490 | 40.42 | 114.03 | 436 | 56985 | 23.28 | 103.34 | 700 | 58918 | 25.03 | 116.25 |
| 173 | 53502 | 39.49 | 105.3  | 437 | 56986 | 22.53 | 103.44 | 701 | 58921 | 25.58 | 117.21 |
| 174 | 53513 | 40.48 | 107.3  | 438 | 56991 | 23.41 | 104.19 | 702 | 58926 | 25.18 | 117.24 |
| 175 | 53519 | 39.18 | 106.54 | 439 | 57003 | 34.52 | 106.59 | 703 | 58927 | 25.06 | 117.06 |
| 176 | 53529 | 39.06 | 107.59 | 440 | 57014 | 34.33 | 105.53 | 704 | 58931 | 25.43 | 118.06 |
| 177 | 53543 | 39.5  | 109.59 | 441 | 57025 | 34.28 | 107.28 | 705 | 58933 | 25.55 | 118.59 |
| 178 | 53564 | 39.17 | 111.16 | 442 | 57028 | 33.54 | 107.35 | 706 | 58936 | 25.21 | 118.41 |
| 179 | 53578 | 39.18 | 112.26 | 443 | 57030 | 34.51 | 108.03 | 707 | 58944 | 25.3  | 119.47 |
| 180 | 53588 | 39.02 | 113.32 | 444 | 57034 | 34.21 | 108.1  | 708 | 59007 | 24.02 | 105.02 |
| 181 | 53593 | 39.56 | 114.41 | 445 | 57037 | 34.56 | 108.59 | 709 | 59021 | 24.33 | 107.02 |
| 182 | 53594 | 39.27 | 114.11 | 446 | 57046 | 34.25 | 109.57 | 710 | 59023 | 24.46 | 108    |
| 183 | 53602 | 38.52 | 105.34 | 447 | 57048 | 34.2  | 108.43 | 711 | 59037 | 24.01 | 108.05 |
| 184 | 53612 | 38    | 106.15 | 448 | 57049 | 34.24 | 109.38 | 712 | 59046 | 24.18 | 109.16 |
| 185 | 53614 | 38.25 | 107.05 | 449 | 57051 | 34.48 | 111.11 | 713 | 59058 | 24.13 | 110.32 |
| 186 | 53615 | 38.44 | 106.4  | 450 | 57067 | 34.02 | 110.02 | 714 | 59065 | 24.26 | 111.31 |
| 187 | 53646 | 38.15 | 109.25 | 451 | 57071 | 34.5  | 112.26 | 715 | 59072 | 24.47 | 112.23 |
| 188 | 53651 | 38.55 | 110.07 | 452 | 57077 | 33.47 | 111.38 | 716 | 59082 | 24.55 | 113.07 |
| 189 | 53663 | 38.55 | 111.51 | 453 | 57083 | 34.45 | 113.35 | 717 | 59087 | 23.52 | 113.32 |
| 190 | 53664 | 38.28 | 111.08 | 454 | 57089 | 34.01 | 113.49 | 718 | 59088 | 24.1  | 113.24 |
| 191 | 53673 | 38.45 | 112.42 | 455 | 57091 | 34.5  | 114.2  | 719 | 59092 | 24.53 | 114.46 |
| 192 | 53698 | 38.04 | 114.26 | 456 | 57106 | 33.16 | 105.57 | 720 | 59096 | 24.22 | 114.29 |
| 193 | 53704 | 37.33 | 105.11 | 457 | 57124 | 33.32 | 107.08 | 721 | 59097 | 24.03 | 114.12 |
| 194 | 53705 | 37.29 | 105.38 | 458 | 57127 | 33.05 | 107.1  | 722 | 59102 | 24.57 | 115.29 |
| 195 | 53723 | 37.43 | 107.27 | 459 | 57134 | 33.36 | 108.02 | 723 | 59107 | 24.06 | 115.15 |
| 196 | 53725 | 37.33 | 107.36 | 460 | 57143 | 33.57 | 109.56 | 724 | 59113 | 24.51 | 116.49 |
| 197 | 53735 | 37.24 | 108.24 | 461 | 57144 | 33.22 | 109.17 | 725 | 59116 | 24.21 | 116.42 |
| 198 | 53738 | 37.05 | 108.15 | 462 | 57154 | 33.35 | 110.1  | 726 | 59117 | 24.08 | 116.15 |
| 199 | 53740 | 37.55 | 109.1  | 463 | 57156 | 33.18 | 111.3  | 727 | 59126 | 24.32 | 117.41 |
| 200 | 53754 | 37.37 | 110.04 | 464 | 57178 | 33.04 | 112.32 | 728 | 59133 | 24.53 | 118.54 |
| 201 | 53764 | 37.33 | 111.09 | 465 | 57181 | 33.53 | 113.03 | 729 | 59134 | 24.27 | 118.04 |
| 202 | 53772 | 37.55 | 112.31 | 466 | 57193 | 33.45 | 114.3  | 730 | 59209 | 23.18 | 105.57 |
| 203 | 53775 | 37.25 | 112.35 | 467 | 57206 | 32.26 | 105.48 | 731 | 59211 | 23.55 | 106.32 |
| 204 | 53787 | 37.04 | 112.59 | 468 | 57211 | 32.43 | 106.26 | 732 | 59218 | 23.08 | 106.25 |
| 205 | 53798 | 37.04 | 114.3  | 469 | 57232 | 32.55 | 108.38 | 733 | 59228 | 23.19 | 107.35 |

|     |       |       |        |     |       |       |        |     |       |       |        |
|-----|-------|-------|--------|-----|-------|-------|--------|-----|-------|-------|--------|
| 206 | 53806 | 36.34 | 105.54 | 470 | 57237 | 32.05 | 108.11 | 734 | 59242 | 23.45 | 109.13 |
| 207 | 53810 | 36.59 | 106.08 | 471 | 57238 | 32.18 | 108.04 | 735 | 59254 | 23.23 | 110.03 |
| 208 | 53817 | 35.58 | 106.45 | 472 | 57245 | 32.32 | 109.21 | 736 | 59265 | 23.3  | 111.25 |
| 209 | 53821 | 36.41 | 107.22 | 473 | 57251 | 32.59 | 110.21 | 737 | 59271 | 23.38 | 112.26 |
| 210 | 53845 | 36.36 | 109.32 | 474 | 57259 | 32.02 | 110.46 | 738 | 59278 | 23.03 | 112.27 |
| 211 | 53853 | 36.47 | 110.54 | 475 | 57265 | 32.25 | 111.4  | 739 | 59280 | 23.36 | 113.04 |
| 212 | 53854 | 36.38 | 110.01 | 476 | 57278 | 32.14 | 112.04 | 740 | 59287 | 23    | 113.13 |
| 213 | 53859 | 36.05 | 110.41 | 477 | 57279 | 32.09 | 112.4  | 741 | 59289 | 22.54 | 114.04 |
| 214 | 53863 | 37.02 | 111.54 | 478 | 57285 | 32.22 | 113.23 | 742 | 59293 | 23.44 | 114.41 |
| 215 | 53868 | 36.05 | 111.32 | 479 | 57290 | 32.58 | 114.03 | 743 | 59294 | 23.18 | 113.49 |
| 216 | 53877 | 36.1  | 112.15 | 480 | 57297 | 32.1  | 114.05 | 744 | 59298 | 23.22 | 114.11 |
| 217 | 53884 | 36.31 | 113.02 | 481 | 57306 | 31.37 | 105.57 | 745 | 59303 | 23.56 | 115.46 |
| 218 | 53898 | 36.08 | 114.21 | 482 | 57313 | 31.51 | 106.45 | 746 | 59304 | 23.38 | 115.11 |
| 219 | 53903 | 35.56 | 105.58 | 483 | 57328 | 31.16 | 107.28 | 747 | 59316 | 23.2  | 116.4  |
| 220 | 53915 | 35.33 | 106.4  | 484 | 57343 | 31.55 | 109.41 | 748 | 59317 | 23.02 | 116.18 |
| 221 | 53923 | 35.42 | 107.44 | 485 | 57348 | 31.04 | 109.29 | 749 | 59321 | 23.45 | 117.31 |
| 222 | 53929 | 35.15 | 107.54 | 486 | 57355 | 31.04 | 110.24 | 750 | 59324 | 23.26 | 117.02 |
| 223 | 53942 | 35.5  | 109.31 | 487 | 57358 | 31    | 110.36 | 751 | 59417 | 22.22 | 106.45 |
| 224 | 53948 | 35.01 | 109.32 | 488 | 57359 | 31.19 | 110.47 | 752 | 59431 | 22.48 | 108.18 |
| 225 | 53955 | 35.26 | 110.25 | 489 | 57378 | 31.1  | 112.34 | 753 | 59446 | 22.25 | 109.17 |
| 226 | 53959 | 35.02 | 111    | 490 | 57381 | 31.43 | 113.2  | 754 | 59453 | 22.38 | 110.07 |
| 227 | 53963 | 35.39 | 111.22 | 491 | 57395 | 31.34 | 114.04 | 755 | 59456 | 22.22 | 110.56 |
| 228 | 53968 | 35.1  | 111.49 | 492 | 57399 | 31.11 | 114.58 | 756 | 59462 | 22.46 | 111.34 |
| 229 | 53975 | 35.29 | 112.24 | 493 | 57405 | 30.3  | 105.25 | 757 | 59478 | 22.16 | 112.46 |
| 230 | 53986 | 35.21 | 113.5  | 494 | 57411 | 30.48 | 106.04 | 758 | 59485 | 22.24 | 113.21 |
| 231 | 54012 | 44.4  | 118    | 495 | 57426 | 30.41 | 107.49 | 759 | 59488 | 22.17 | 113.35 |
| 232 | 54026 | 44.34 | 120.54 | 496 | 57432 | 30.48 | 108.25 | 760 | 59493 | 22.33 | 114.07 |
| 233 | 54027 | 44    | 119.12 | 497 | 57439 | 30.17 | 108.51 | 761 | 59501 | 22.46 | 115.22 |
| 234 | 54041 | 44.49 | 123.05 | 498 | 57445 | 30.36 | 109.38 | 762 | 59626 | 21.46 | 108.18 |
| 235 | 54049 | 44.15 | 123.58 | 499 | 57447 | 30.16 | 109.22 | 763 | 59632 | 21.57 | 108.36 |
| 236 | 54063 | 44.51 | 125.54 | 500 | 57458 | 30.1  | 110.37 | 764 | 59644 | 21.43 | 109.05 |
| 237 | 54064 | 44.27 | 125.08 | 501 | 57461 | 30.42 | 111.05 | 765 | 59647 | 21.02 | 109.05 |
| 238 | 54094 | 44.35 | 129.36 | 502 | 57476 | 30.24 | 112.04 | 766 | 59658 | 21.02 | 110.28 |
| 239 | 54096 | 44.23 | 131.09 | 503 | 57482 | 30.56 | 113.51 | 767 | 59663 | 21.54 | 111.57 |
| 240 | 54102 | 43.51 | 116.05 | 504 | 57483 | 30.39 | 113.19 | 768 | 59664 | 21.3  | 111    |
| 241 | 54115 | 43.3  | 118.03 | 505 | 57493 | 30.28 | 114.33 | 769 | 59673 | 21.41 | 112.48 |
| 242 | 54134 | 43.36 | 121.12 | 506 | 57494 | 30.25 | 114.17 | 770 | 59754 | 20.2  | 110.1  |
| 243 | 54135 | 43.4  | 122.15 | 507 | 57502 | 29.41 | 105.42 | 771 | 59758 | 20    | 110.25 |
| 244 | 54142 | 43.4  | 123.29 | 508 | 57512 | 29.59 | 106.17 | 772 | 59838 | 19.08 | 108.38 |
| 245 | 54157 | 43.11 | 124.2  | 509 | 57516 | 29.3  | 106.33 | 773 | 59845 | 19.31 | 109.32 |
| 246 | 54161 | 43.52 | 125.2  | 510 | 57517 | 29.19 | 106.15 | 774 | 59849 | 19.06 | 109.53 |
| 247 | 54165 | 43.31 | 125.38 | 511 | 57520 | 29.51 | 107.04 | 775 | 59855 | 19.25 | 110.28 |

---

|            |       |       |        |            |       |       |        |            |       |       |        |
|------------|-------|-------|--------|------------|-------|-------|--------|------------|-------|-------|--------|
| <b>248</b> | 54181 | 43.42 | 127.19 | <b>512</b> | 57523 | 29.53 | 107.42 | <b>776</b> | 59948 | 18.14 | 109.29 |
| <b>249</b> | 54186 | 43.21 | 128.11 | <b>513</b> | 57536 | 29.31 | 108.47 | <b>777</b> | 59954 | 18.3  | 110.02 |
| <b>250</b> | 54195 | 43.17 | 129.48 | <b>514</b> | 57545 | 29.34 | 109.29 | <b>778</b> | 59981 | 16.5  | 112.2  |
| <b>251</b> | 54208 | 42.15 | 116.13 | <b>515</b> | 57554 | 29.24 | 110.08 |            |       |       |        |
| <b>252</b> | 54213 | 42.54 | 119    | <b>516</b> | 57562 | 29.36 | 111.23 |            |       |       |        |
| <b>253</b> | 54218 | 42.16 | 118.54 | <b>517</b> | 57573 | 29.5  | 112.5  |            |       |       |        |
| <b>254</b> | 54226 | 42.23 | 120.43 | <b>518</b> | 57574 | 29.2  | 112.25 |            |       |       |        |
| <b>255</b> | 54236 | 42.24 | 122.29 | <b>519</b> | 57581 | 29.49 | 113.24 |            |       |       |        |
| <b>256</b> | 54237 | 42.1  | 121.38 | <b>520</b> | 57583 | 29.59 | 113.52 |            |       |       |        |
| <b>257</b> | 54243 | 43.12 | 124.04 | <b>521</b> | 57584 | 29.27 | 113.12 |            |       |       |        |
| <b>258</b> | 54254 | 42.33 | 124.01 | <b>522</b> | 57595 | 29.36 | 114.23 |            |       |       |        |
| <b>259</b> | 54259 | 42.06 | 124.57 | <b>523</b> | 57598 | 29.02 | 114.34 |            |       |       |        |
| <b>260</b> | 54260 | 42.55 | 125.05 | <b>524</b> | 57604 | 28.47 | 105.22 |            |       |       |        |
| <b>261</b> | 54263 | 42.57 | 125.59 | <b>525</b> | 57606 | 28    | 106.5  |            |       |       |        |
| <b>262</b> | 54266 | 42.31 | 125.38 | <b>526</b> | 57608 | 28.1  | 105.26 |            |       |       |        |
| <b>263</b> | 54273 | 42.57 | 126.42 | <b>527</b> | 57612 | 28.46 | 106.4  |            |       |       |        |
| <b>264</b> | 54276 | 42.21 | 126.49 | <b>528</b> | 57614 | 28.33 | 105.59 |            |       |       |        |

---
